# Supplementary material
Source: Springer Nature journal article supplement (https://www.springermedizin.de/resource/supplementary/12885_2013_4205_MOESM2_ESM.pdf/9465770)

### VIM

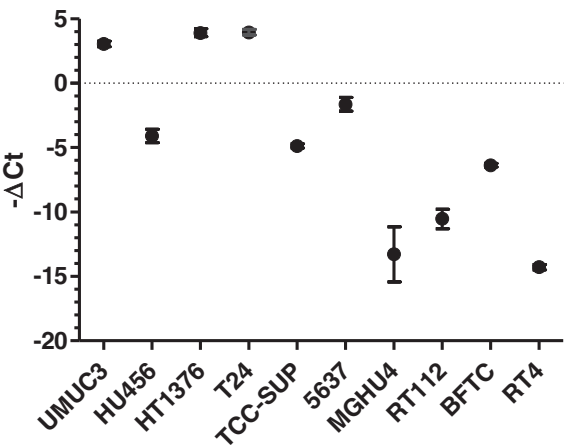

### NCDH

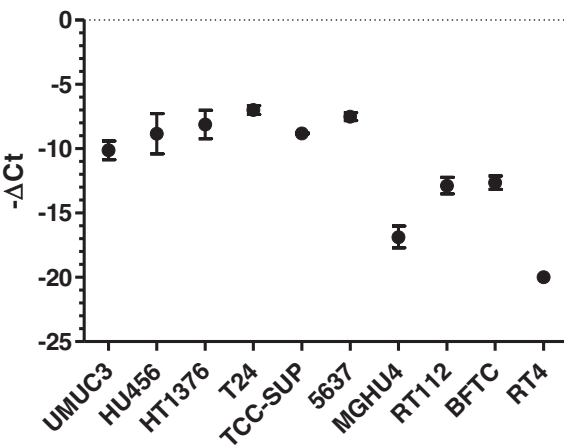

### ECDH

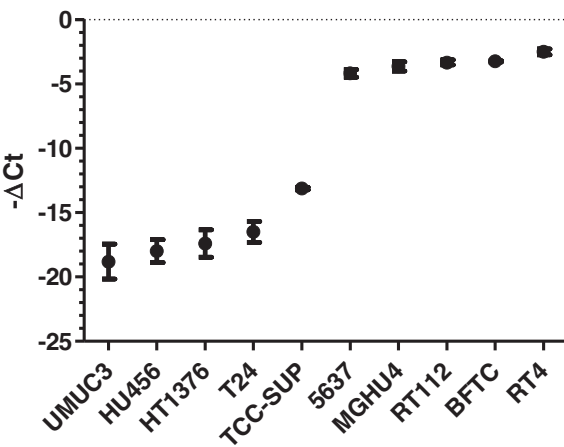

Supplement: MOESM2 [file 9465770]
